# Supplementary material for: An unusual three-dimensional self-penetrating network derived from cross-linking of two-fold interpenetrating nets via ligand-unsupported Ag–Ag bonds: synthesis, structure, luminescence, and theoretical study
Source: Royal Society of Chemistry journal article supplement (doi:10.1039/c2nj20888a), 2012-01-01
Supplement: c2nj20888a.pdf [file c2nj20888a.pdf]

## Supporting Information

### **An unusual three-dimensional self-penetrating network derived from cross-linking of twofold interpenetrating nets via ligand-unsupported Ag–Ag bonds: synthesis, structure, luminescence, and theoretical study †**

Xue-Zhi Song,<sup>ab</sup> Chao Qin,<sup>a</sup> Wei Guan,<sup>a</sup> Shu-Yan Song<sup>\*a</sup> and Hong-Jie Zhang<sup>\*a</sup>

Figure S1: PXRD patterns of **1**.

Figure S2: TG and DSC curves of compound **1**.

Figure S3: IR spectrum of compound **1**.

Figure S4: <sup>1</sup>H NMR spectrum of H<sub>2</sub>L ligand.

Figure S5: View of the asymmetric unit of H<sub>2</sub>L ligand.

Figure S6: Schematic view of the disordered part of H<sub>2</sub>L ligand.

Figure S7: Hydrogen bonds in H<sub>2</sub>L ligand.

Table S1: Crystallographic data for H<sub>2</sub>L.

Table S2: Hydrogen bonds for H<sub>2</sub>L.

Text S1: Description and discussion of H<sub>2</sub>L crystal structure.

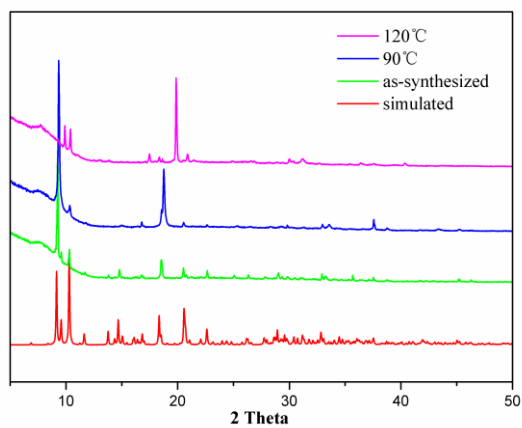

**Fig. S1.** PXRD patterns of **1**: simulated, as-synthesized, treated at 90 °C and 120 °C, respectively.

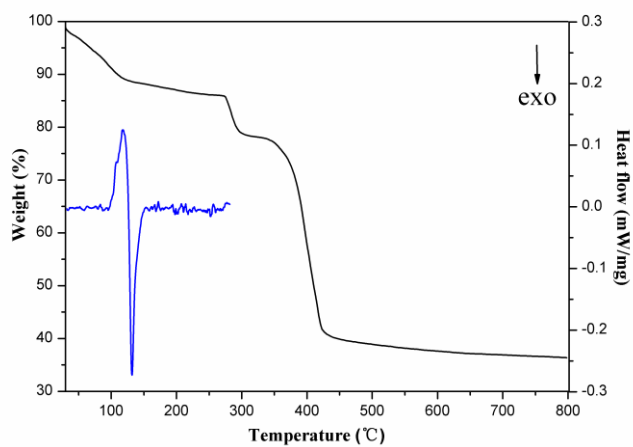

**Fig. S2.** TG and DSC curves of compound **1**.

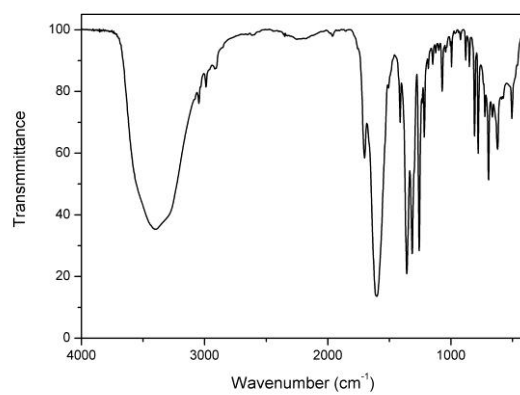

**Fig. S3.** IR spectrum of compound **1**.

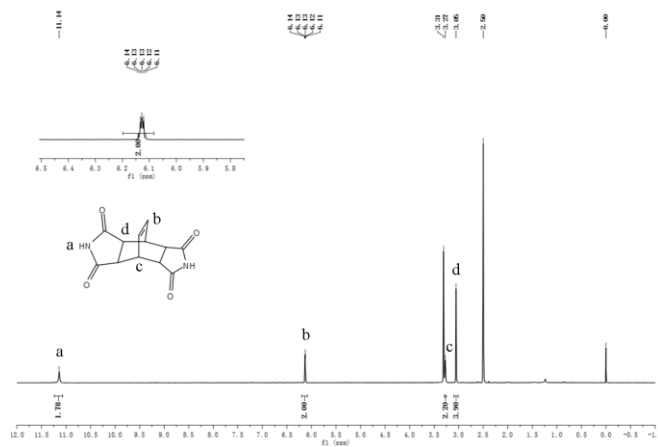

**Fig. S4.** <sup>1</sup>H NMR spectrum of H<sub>2</sub>L ligand.

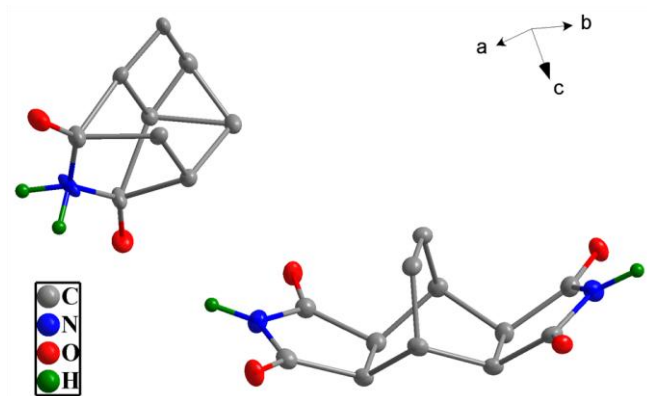

**Fig. S5.** View of the asymmetric unit of H<sub>2</sub>L ligand.

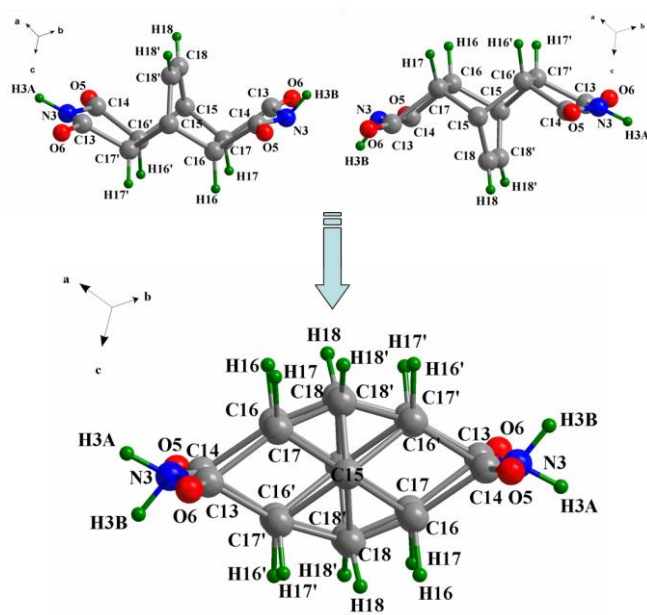

**Fig. S6.** Schematic view of the disordered part of H<sub>2</sub>L ligand.

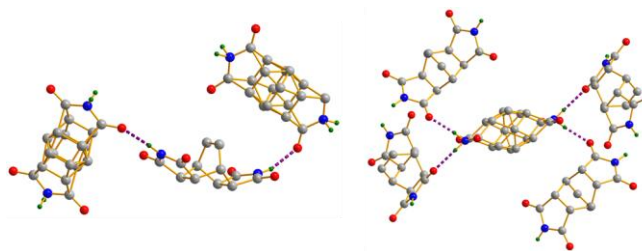

**Fig. S7.** Hydrogen bonds in H<sub>2</sub>L ligand.

**Table S1:** Crystallographic data for H<sub>2</sub>L.

|                                                                                                                                                                    | <b>H<sub>2</sub>L</b>                                         |
|--------------------------------------------------------------------------------------------------------------------------------------------------------------------|---------------------------------------------------------------|
| Empirical formula                                                                                                                                                  | C <sub>12</sub> H <sub>10</sub> N <sub>2</sub> O <sub>4</sub> |
| <i>M</i>                                                                                                                                                           | 246.22                                                        |
| T/K                                                                                                                                                                | 123(2)                                                        |
| $\lambda$ / Å                                                                                                                                                      | 0.71073                                                       |
| crystal system                                                                                                                                                     | monoclinic                                                    |
| space group                                                                                                                                                        | <i>P</i> 2 <sub>1</sub> / <i>n</i>                            |
| <i>a</i> / Å                                                                                                                                                       | 7.6395(4)                                                     |
| <i>b</i> / Å                                                                                                                                                       | 21.1972(11)                                                   |
| <i>c</i> / Å                                                                                                                                                       | 9.8455(5)                                                     |
| $\alpha$ / deg                                                                                                                                                     | 90                                                            |
| $\beta$ / deg                                                                                                                                                      | 97.6830(10)                                                   |
| $\gamma$ / deg                                                                                                                                                     | 90                                                            |
| <i>V</i> / Å <sup>3</sup>                                                                                                                                          | 1580.03(14)                                                   |
| <i>Z</i>                                                                                                                                                           | 6                                                             |
| $\mu$ /mm <sup>-1</sup>                                                                                                                                            | 0.119                                                         |
| <i>R</i> 1 <sup><i>a</i></sup> [ <i>I</i> > 2 $\sigma$ ( <i>I</i> )]                                                                                               | 0.0630                                                        |
| <i>wR</i> 2 <sup><i>b</i></sup> [ <i>I</i> > 2 $\sigma$ ( <i>I</i> )]                                                                                              | 0.1343                                                        |
| GOF on <i>F</i> <sup>2</sup>                                                                                                                                       | 1.118                                                         |
| <sup><i>a</i></sup> <i>R</i> 1 = $\Sigma  F_0  -  F_c   / \Sigma F_0 $ ; <sup><i>b</i></sup> <i>wR</i> 2 = $\Sigma[w(F_0^2 - F_c^2)^2] / \Sigma[w(F_0^2)^2]^{1/2}$ |                                                               |

**Table S2:** Hydrogen bonds for H<sub>2</sub>L.

| D-H...A             | <i>d</i> (D-H)/Å | <i>d</i> (H...A)/Å | <i>d</i> (D...A)/Å | <(DHA)/deg |
|---------------------|------------------|--------------------|--------------------|------------|
| N(2)-H(2N)...O(5)   | 0.92(4)          | 2.06(4)            | 2.944(4)           | 161(4)     |
| N(3)-H(3A)...O(1)#1 | 0.899(11)        | 2.104(17)          | 2.995(4)           | 171(7)     |
| N(3)-H(3B)...O(2)#2 | 0.901(10)        | 2.003(18)          | 2.896(4)           | 170(7)     |
| N(1)-H(1N)...O(6)#3 | 0.96(4)          | 1.93(4)            | 2.879(4)           | 170(4)     |

Symmetry transformations used to generate equivalent atoms: #1 =  $-x+3/2, y-1/2, -z+3/2$ ; #2 =  $-x+1, -y+2, -z+2$ ; #3 =  $-x+1/2, y+1/2, -z+3/2$ .

**Text S1:** Description and discussion of H<sub>2</sub>L crystal structure.

There are two independent molecules of H<sub>2</sub>L, one of which lies disordered about an inversion center. We drew a picture in order to show this disorder clearly (Fig. S6). In the crystal, the regular H<sub>2</sub>L molecule interacted with two adjacent disordered H<sub>2</sub>L molecules through N-H...O hydrogen bonds. While one disordered H<sub>2</sub>L molecule and four adjacent regular H<sub>2</sub>L molecules are maintained together through four disordered H atoms arising from the disordered H<sub>2</sub>L ligand with the oxygen atoms from regular H<sub>2</sub>L. The hydrogen bonds are shown in Fig. S7 and listed in Table S2.
